# Supplementary material for: DNASE1L3 as an indicator of favorable survival in hepatocellular carcinoma patients following resection
Source: Aging (Albany NY). 2020 Jan 24;12(2):1171–85. doi: 10.18632/aging.102675 (PMC7053625; doi:10.18632/aging.102675)
Supplement: Supplementary Figures [file aging-12-102675-s001..pdf]

## SUPPLEMENTARY FIGURES

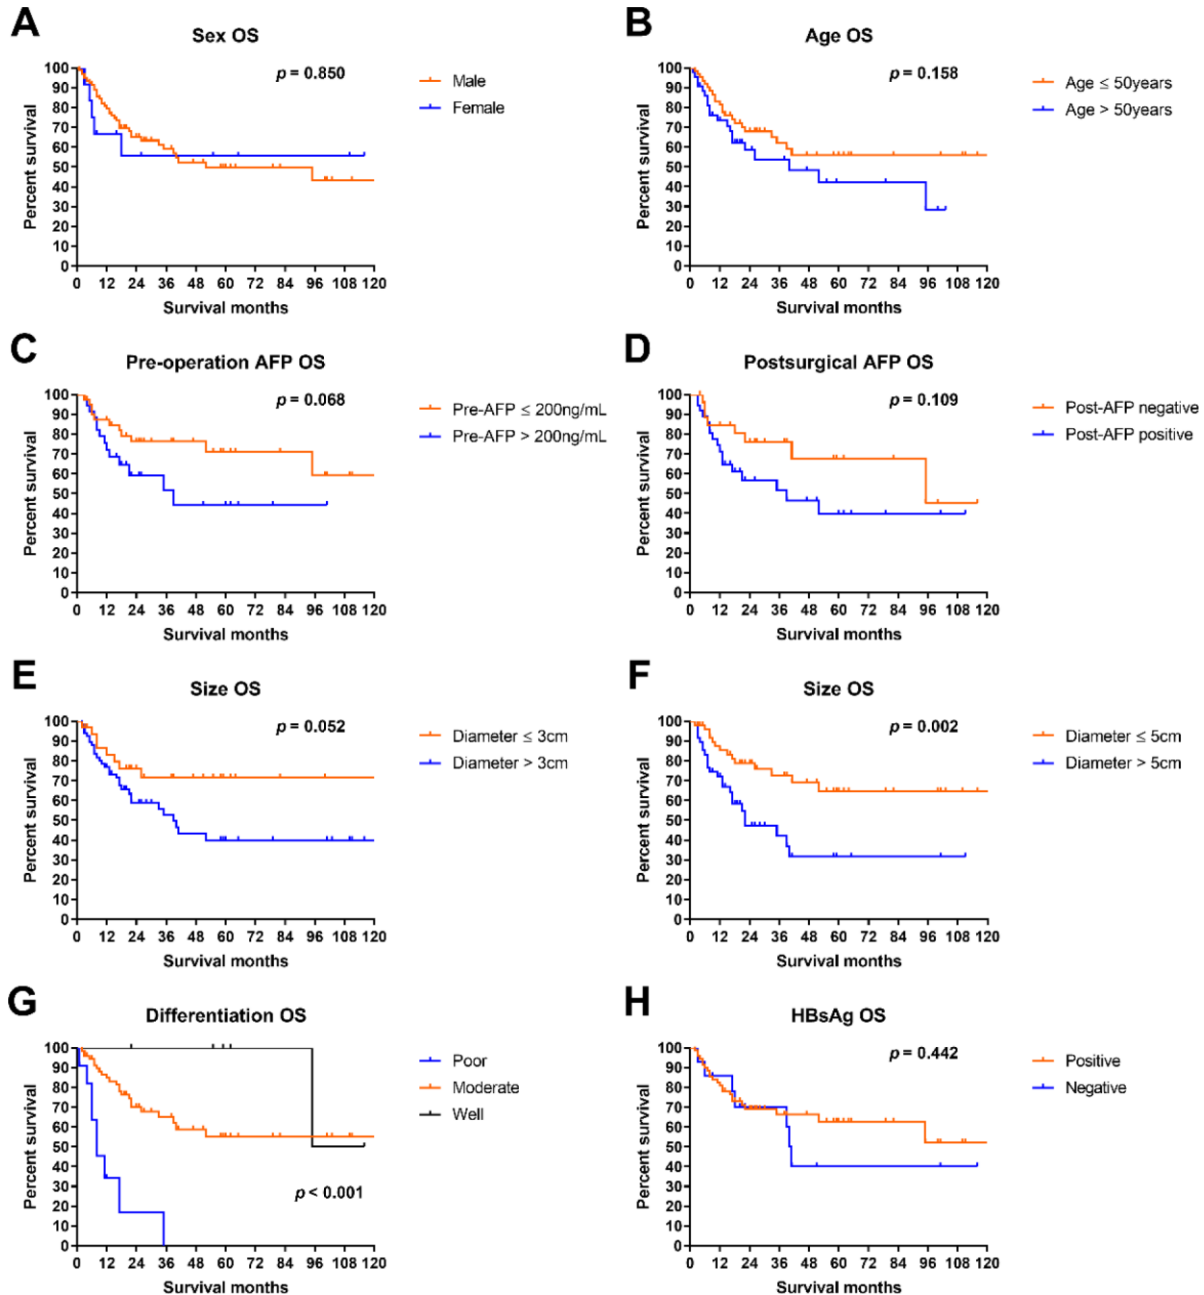

**Supplementary Figure 1. Overall survival analyses of HCC patients by clinicopathological factors.** Overall survival analyses of HCC patients after surgical resection by sex (A), age (B), pre-operation AFP level (C), postsurgical AFP level (D), size (E and F), differentiation level (G) and HBsAg (H).

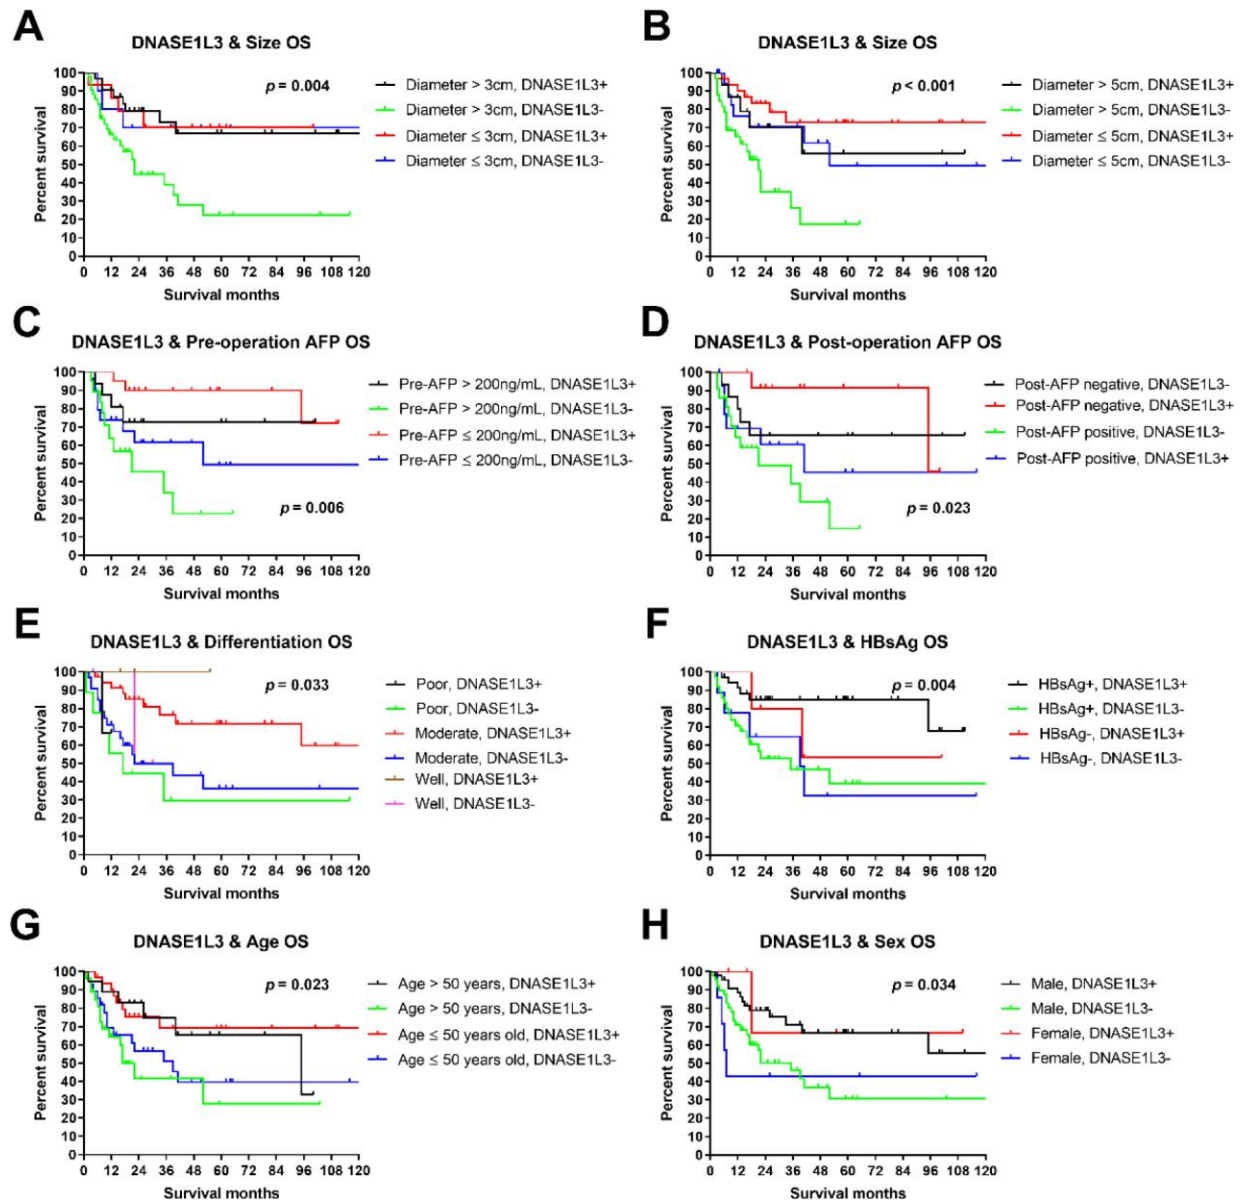

**Supplementary Figure 2. Overall survival analyses of HCC patients by DNASE1L3 and clinicopathological factors.** Overall survival analyses of HCC patients after surgical resection by DNASE1L3 expression and size (A and B), pre-operation AFP level (C), post-operation AFP level (D), differentiation level (E), HBsAg (F), age (G) or sex (H).
